# Supplementary material for: Identification of Immune-Related Genes Concurrently Involved in Critical Illnesses Across Different Etiologies: A Data-Driven Analysis
Source: Front Immunol. 2022 May 9;13:858864. doi: 10.3389/fimmu.2022.858864 (PMC9124755; doi:10.3389/fimmu.2022.858864)
Supplement: Supplementary file 7 [file Table_3.xlsx]

## Sheet: Table S3
Table S3. Genes significantly downregulated and upregulated in sepsis patients.
Gene symbol	logFC	P.Value	adj.P.Value	Expression change
IL2RB	-3.21293	6.06561e-58	1.55264e-55	Down
BCL11B	-3.04947	2.24442e-60	7.72621e-58	Down
FCER1A	-2.92155	8.41255e-62	3.84323e-59	Down
CCR3	-2.8927	9.44105e-54	1.36594e-51	Down
TRBC1	-2.88657	8.98156e-42	2.96897e-40	Down
IL7R	-2.80201	3.77374e-41	1.14161e-39	Down
CX3CR1	-2.60495	6.43874e-34	1.04517e-32	Down
CCR7	-2.54179	3.70225e-35	6.56476e-34	Down
KLRB1	-2.52807	5.06417e-43	1.95195e-41	Down
LCK	-2.45861	6.5042e-57	1.44292e-54	Down
FGFBP2	-2.4176	9.53464e-28	9.57588e-27	Down
CD3D	-2.40307	3.29714e-40	9.27193e-39	Down
GPR18	-2.38673	6.72584e-49	5.28693e-47	Down
HLA-DPA1	-2.37956	2.60538e-45	1.28126e-43	Down
SULF2	-2.37853	3.24395e-27	3.10791e-26	Down
CD2	-2.37683	9.69392e-34	1.55087e-32	Down
ITK	-2.35727	1.58539e-44	7.09731e-43	Down
HLA-DQA1	-2.3442	7.37218e-37	1.56256e-35	Down
GNLY	-2.33672	2.00428e-30	2.46717e-29	Down
NLRC3	-2.31441	5.28141e-56	1.03381e-53	Down
CHI3L1	-2.30466	8.23905e-19	4.475e-18	Down
P2RY10	-2.28908	3.52664e-72	7.04129e-69	Down
CD3G	-2.26468	1.20007e-37	2.69826e-36	Down
PRF1	-2.23707	4.97226e-30	5.90226e-29	Down
GZMH	-2.23409	4.84663e-16	2.1658e-15	Down
LRRN3	-2.22514	1.64738e-55	3.04551e-53	Down
ARL4C	-2.21689	8.07007e-45	3.69557e-43	Down
CD27	-2.21623	9.74337e-53	1.1719e-50	Down
ESYT1	-2.21076	9.67133e-52	1.03816e-49	Down
CD74	-2.20975	6.73579e-53	8.30165e-51	Down
HLA-DMA	-2.18767	1.0608e-41	3.47213e-40	Down
LDHB	-2.18646	5.11174e-47	2.86688e-45	Down
GPR183	-2.17621	6.53852e-52	7.25267e-50	Down
LEF1	-2.16913	1.89023e-62	9.93166e-60	Down
CD247	-2.1634	6.47108e-53	8.0751e-51	Down
NFATC2	-2.14237	1.03827e-48	7.7933e-47	Down
NELL2	-2.14155	1.58798e-65	1.21944e-62	Down
SGK1	-2.13862	1.29122e-41	4.17162e-40	Down
HVCN1	-2.12312	4.28637e-44	1.76094e-42	Down
TGFBR3	-2.11787	1.10767e-37	2.51316e-36	Down
IL32	-2.11348	1.26398e-39	3.41035e-38	Down
CPVL	-2.11275	1.11305e-23	8.56052e-23	Down
FCRL3	-2.10011	1.1792e-41	3.8345e-40	Down
CECR1	-2.08955	5.12953e-31	6.6504e-30	Down
MS4A1	-2.08146	1.63769e-29	1.85996e-28	Down
GZMK	-2.0659	4.11608e-24	3.27361e-23	Down
GZMB	-2.0615	8.01685e-20	4.69122e-19	Down
HLA-DPB1	-2.0436	1.73785e-45	8.58859e-44	Down
EVL	-2.02833	2.65669e-56	5.41259e-54	Down
EOMES	-2.00805	1.0944e-46	5.87387e-45	Down
TRAF5	-2.0028	1.40771e-49	1.21148e-47	Down
HLA-DMB	-1.99549	1.28205e-49	1.12269e-47	Down
RORA	-1.98896	7.29816e-45	3.35749e-43	Down
PTGER4	-1.98326	1.24726e-28	1.32321e-27	Down
CLIC3	-1.97737	1.93467e-42	6.94742e-41	Down
FAIM3	-1.97426	6.43172e-61	2.56831e-58	Down
RASGRP1	-1.9589	1.27095e-57	3.0946e-55	Down
TIAM1	-1.9585	5.71164e-49	4.71234e-47	Down
MYC	-1.9563	6.6874e-36	1.27893e-34	Down
MYBL1	-1.92547	5.08405e-30	6.0278e-29	Down
LBH	-1.92174	5.20421e-42	1.77316e-40	Down
ABLIM1	-1.91043	4.597e-67	4.58918e-64	Down
THEMIS	-1.9102	3.67059e-30	4.40426e-29	Down
KLRG1	-1.90818	2.57716e-41	7.94069e-40	Down
TBX21	-1.90054	2.4828e-35	4.48207e-34	Down
RARRES3	-1.89866	2.50788e-22	1.77059e-21	Down
STMN3	-1.88271	7.31408e-61	2.80832e-58	Down
STAT4	-1.86984	2.94173e-32	4.14792e-31	Down
RRP1B	-1.86518	1.56245e-45	7.76017e-44	Down
DOCK10	-1.85585	1.02793e-54	1.73928e-52	Down
ST6GAL1	-1.84893	4.15571e-47	2.35719e-45	Down
CD8A	-1.84439	2.10745e-25	1.80744e-24	Down
GZMM	-1.84254	5.35718e-44	2.16521e-42	Down
FAM117B	-1.83682	9.51949e-30	1.10247e-28	Down
GOLGA8A	-1.83397	2.36988e-39	6.17715e-38	Down
PASK	-1.82701	8.80188e-47	4.80159e-45	Down
CDKN1C	-1.82427	1.09943e-26	1.02385e-25	Down
LGALS2	-1.81716	1.10616e-17	5.55471e-17	Down
SH2D2A	-1.81525	1.82377e-28	1.9165e-27	Down
CCL5	-1.79603	3.39975e-23	2.54802e-22	Down
TXK	-1.79129	1.0174e-46	5.49012e-45	Down
S1PR5	-1.78049	2.83396e-35	5.08838e-34	Down
CD5	-1.77419	1.68994e-54	2.72108e-52	Down
SLC38A1	-1.77351	1.99995e-44	8.68067e-43	Down
PRKCH	-1.76948	1.68943e-44	7.42977e-43	Down
TBC1D4	-1.76835	1.59297e-48	1.16077e-46	Down
PTPRCAP	-1.76734	5.98599e-32	8.24251e-31	Down
HLA-DRA	-1.75931	2.8042e-30	3.40979e-29	Down
CD96	-1.75814	9.3844e-64	5.85528e-61	Down
BTN3A3	-1.74309	4.93687e-36	9.56985e-35	Down
CD81	-1.74274	1.59487e-38	3.90235e-37	Down
ETS1	-1.74265	9.91212e-48	6.26283e-46	Down
TGFBI	-1.74211	6.02033e-26	5.33756e-25	Down
SAMD3	-1.73595	3.55369e-45	1.69744e-43	Down
SKAP1	-1.73367	5.43447e-48	3.59287e-46	Down
RUNX3	-1.73187	3.01711e-42	1.04692e-40	Down
GIMAP6	-1.7304	1.44428e-35	2.66511e-34	Down
IL23A	-1.72664	4.97666e-41	1.49195e-39	Down
RPS6KA5	-1.72504	1.5893e-41	5.03682e-40	Down
GBP5	-1.72086	6.07367e-12	2.0436e-11	Down
ZFP36L2	-1.72071	1.77689e-42	6.40387e-41	Down
TBC1D9	-1.71997	1.05349e-31	1.43088e-30	Down
FYN	-1.7119	5.33906e-36	1.02895e-34	Down
DYRK2	-1.71031	1.05203e-59	2.91733e-57	Down
PLEKHA1	-1.70265	1.56204e-62	8.66327e-60	Down
GIMAP7	-1.69636	5.70958e-30	6.74541e-29	Down
LDOC1L	-1.69288	7.95371e-51	7.78449e-49	Down
LYSMD2	-1.69106	5.76713e-20	3.4229e-19	Down
APOL3	-1.69096	9.86178e-45	4.49544e-43	Down
KLRF1	-1.68935	4.21366e-25	3.55278e-24	Down
DNMT1	-1.67442	1.80253e-46	9.47086e-45	Down
CXXC5	-1.67352	1.36969e-45	6.83682e-44	Down
BACH2	-1.66783	3.2935e-46	1.70358e-44	Down
TCF7	-1.66689	6.81338e-52	7.47451e-50	Down
PRKCQ	-1.65949	2.10154e-57	4.99517e-55	Down
GIMAP4	-1.65739	4.53583e-24	3.57954e-23	Down
IMP3	-1.6569	1.39463e-55	2.6269e-53	Down
PEBP1	-1.65686	5.91073e-50	5.36426e-48	Down
IARS	-1.65187	1.18572e-34	2.03735e-33	Down
RPL22	-1.65036	2.02382e-42	7.2415e-41	Down
PTPN4	-1.64353	4.86587e-30	5.78286e-29	Down
CFD	-1.6434	9.94813e-12	3.29722e-11	Down
FGL2	-1.64185	2.87101e-24	2.30396e-23	Down
NCL	-1.64097	3.37357e-47	1.94672e-45	Down
PID1	-1.62642	1.05435e-52	1.25304e-50	Down
GATA3	-1.62538	2.17851e-70	2.81635e-67	Down
LTB	-1.62518	4.21977e-41	1.27269e-39	Down
ATIC	-1.6251	2.71069e-45	1.32004e-43	Down
FBL	-1.62299	4.6998e-37	1.00899e-35	Down
ZNF573	-1.62248	2.717e-48	1.91013e-46	Down
EPHX2	-1.61433	1.01047e-66	9.1705e-64	Down
CD3E	-1.60862	3.42719e-40	9.61059e-39	Down
IFIT2	-1.60772	1.73941e-08	4.38278e-08	Down
DPEP2	-1.60315	3.69439e-17	1.78861e-16	Down
SGK223	-1.58791	1.00383e-47	6.30268e-46	Down
IMPDH2	-1.58602	4.38545e-43	1.7035e-41	Down
TSHZ1	-1.5809	1.63417e-49	1.39435e-47	Down
SIDT1	-1.57802	4.96344e-52	5.63069e-50	Down
LPXN	-1.56356	2.64257e-47	1.57029e-45	Down
CRIP1	-1.55984	3.227e-21	2.10832e-20	Down
PTGDS	-1.55924	2.32448e-27	2.25294e-26	Down
DENND2D	-1.55866	6.05685e-50	5.44734e-48	Down
MAL	-1.5539	3.01219e-19	1.69222e-18	Down
EIF3L	-1.55268	3.64334e-46	1.87482e-44	Down
UBASH3A	-1.55072	3.85556e-56	7.69801e-54	Down
EMR3	-1.5459	1.3903e-15	6.02928e-15	Down
NPM1	-1.53744	3.74121e-37	8.04924e-36	Down
FBXL16	-1.53671	3.86096e-60	1.24335e-57	Down
TRIB2	-1.53223	4.06504e-45	1.91421e-43	Down
P2RY8	-1.53034	1.40589e-38	3.45689e-37	Down
BIRC3	-1.52964	1.32206e-26	1.22774e-25	Down
ARHGEF18	-1.5267	1.96781e-60	7.01596e-58	Down
GZMA	-1.5244	3.30616e-12	1.13382e-11	Down
RPL10A	-1.52204	7.75289e-38	1.7916e-36	Down
CTSO	-1.51976	1.58518e-29	1.80443e-28	Down
HLA-DRB4	-1.5164	0.000119674	0.000201809	Down
ITM2A	-1.51429	1.22029e-23	9.3709e-23	Down
PPP1R16B	-1.50916	1.2765e-38	3.15429e-37	Down
USP11	-1.50243	9.56048e-48	6.1181e-46	Down
LPIN1	-1.49973	1.23784e-47	7.62797e-46	Down
SLC25A6	-1.48981	4.93669e-37	1.05757e-35	Down
TRAT1	-1.48565	1.25144e-24	1.02402e-23	Down
BLNK	-1.47927	2.41507e-27	2.33395e-26	Down
KLRD1	-1.47756	4.98073e-24	3.91825e-23	Down
IGHM	-1.47505	1.29212e-11	4.24207e-11	Down
SIRPG	-1.4747	8.86758e-61	3.27871e-58	Down
CD160	-1.46491	9.12225e-47	4.94932e-45	Down
SUN1	-1.4634	3.26642e-36	6.48284e-35	Down
PPTC7	-1.4622	3.55726e-31	4.66039e-30	Down
ERAP2	-1.46138	9.74827e-16	4.28898e-15	Down
C12orf57	-1.46129	8.91517e-24	6.89923e-23	Down
SPOCK2	-1.46128	1.5696e-51	1.63222e-49	Down
DHRS3	-1.45779	2.80362e-41	8.5331e-40	Down
FAM102A	-1.45691	4.69418e-63	2.75659e-60	Down
SH2B3	-1.45557	4.28436e-42	1.46978e-40	Down
SBK1	-1.45109	3.48962e-50	3.22564e-48	Down
FHIT	-1.44892	1.74517e-39	4.609e-38	Down
DUSP6	-1.44844	7.85862e-32	1.07765e-30	Down
GLTSCR2	-1.44829	3.94377e-38	9.28554e-37	Down
LOC100131541	-1.44641	3.8651e-22	2.68139e-21	Down
DDX24	-1.44503	2.53945e-55	4.60933e-53	Down
FAM162A	-1.43791	1.2255e-38	3.03576e-37	Down
BTN3A2	-1.43693	4.15554e-15	1.74967e-14	Down
HNRNPA1	-1.43525	1.57553e-46	8.32196e-45	Down
HMGN3	-1.43298	5.10981e-48	3.40075e-46	Down
NMT2	-1.42696	2.25692e-70	2.81635e-67	Down
RPL18	-1.42564	5.55556e-40	1.51948e-38	Down
PLEKHO1	-1.42521	2.8772e-26	2.62072e-25	Down
ZMYND11	-1.42328	2.27888e-29	2.56195e-28	Down
SH2D1B	-1.42084	1.10916e-36	2.29248e-35	Down
MAF	-1.41909	2.87696e-37	6.25724e-36	Down
HNRNPR	-1.419	1.90545e-51	1.90221e-49	Down
ITGA4	-1.41776	5.45031e-42	1.84442e-40	Down
NFATC3	-1.41599	5.22182e-46	2.6733e-44	Down
RFTN1	-1.41254	1.72946e-51	1.77991e-49	Down
CUTA	-1.41243	4.70319e-38	1.10216e-36	Down
CD6	-1.41055	5.01478e-54	7.58524e-52	Down
CST3	-1.40708	4.76207e-23	3.53193e-22	Down
NIPAL3	-1.40106	7.1409e-49	5.52617e-47	Down
IL10RA	-1.39874	9.82363e-48	6.24645e-46	Down
FTO	-1.39731	6.46624e-46	3.29349e-44	Down
ZNF266	-1.39462	2.24617e-37	4.95001e-36	Down
NUP93	-1.39021	1.0283e-48	7.77692e-47	Down
STK39	-1.38689	3.58008e-40	1.00112e-38	Down
RPS4X	-1.38585	3.53632e-36	7.00459e-35	Down
APEX1	-1.38314	7.60203e-33	1.12431e-31	Down
RPL14	-1.37533	1.41331e-41	4.53668e-40	Down
DPP4	-1.37461	2.7995e-48	1.95436e-46	Down
TAGAP	-1.37306	1.09078e-32	1.59432e-31	Down
AUTS2	-1.36864	7.75893e-34	1.2473e-32	Down
PILRA	-1.3578	4.15786e-16	1.86636e-15	Down
RBBP7	-1.35685	8.26875e-42	2.74242e-40	Down
CLEC10A	-1.35666	8.48163e-29	9.15374e-28	Down
MPEG1	-1.35593	6.75419e-32	9.28747e-31	Down
MYCBP2	-1.35452	1.95231e-38	4.7077e-37	Down
CBX7	-1.34935	6.65316e-34	1.07648e-32	Down
NOV	-1.34927	1.29543e-44	5.8517e-43	Down
MAML2	-1.34926	2.27827e-22	1.6119e-21	Down
EIF3F	-1.34865	9.42469e-50	8.4006e-48	Down
TCL1A	-1.34669	5.81006e-20	3.44429e-19	Down
TIGD3	-1.34589	6.34884e-27	5.9906e-26	Down
SET	-1.34106	1.42776e-48	1.0558e-46	Down
RNF125	-1.34062	5.26132e-50	4.81869e-48	Down
CPA3	-1.33823	1.34963e-36	2.76659e-35	Down
FAM43A	-1.33605	3.71605e-53	4.94631e-51	Down
FBXO21	-1.33577	7.11057e-54	1.04389e-51	Down
AES	-1.33539	2.398e-42	8.54971e-41	Down
HSP90AB1	-1.33409	1.32505e-19	7.63297e-19	Down
RPS23	-1.33122	9.09615e-37	1.89973e-35	Down
NDNL2	-1.33006	1.20062e-43	4.75626e-42	Down
METAP1	-1.3282	1.07536e-49	9.50027e-48	Down
SYTL2	-1.32511	5.09688e-40	1.40171e-38	Down
NOL11	-1.32459	1.03516e-43	4.1336e-42	Down
PARP1	-1.32228	8.6112e-53	1.04836e-50	Down
LY9	-1.32088	8.94614e-43	3.32005e-41	Down
IFIT1	-1.32051	0.000486846	0.00076768	Down
HNRNPA0	-1.31791	1.61275e-59	4.35137e-57	Down
PI3	-1.31729	2.30929e-06	4.70579e-06	Down
ADA	-1.31635	2.32139e-32	3.30592e-31	Down
SH3YL1	-1.31549	1.58467e-37	3.53909e-36	Down
NOB1	-1.31415	1.19262e-39	3.22654e-38	Down
RPL15	-1.30961	1.61588e-35	2.95988e-34	Down
LRPPRC	-1.30933	5.00476e-44	2.031e-42	Down
GBP1	-1.30899	2.85477e-07	6.44339e-07	Down
GPR171	-1.30764	2.55832e-13	9.48375e-13	Down
FLT3LG	-1.30528	3.25384e-60	1.08277e-57	Down
CACNA2D3	-1.3008	6.51301e-41	1.92936e-39	Down
AKR1B1	-1.30075	6.90536e-33	1.02431e-31	Down
PDCD4	-1.30072	2.84154e-33	4.36417e-32	Down
ATP8B2	-1.29652	1.48299e-41	4.71488e-40	Down
LY75	-1.29477	2.58024e-16	1.17512e-15	Down
CHMP7	-1.29393	1.18791e-53	1.64707e-51	Down
RPL23A	-1.29246	6.00405e-43	2.28773e-41	Down
ISOC1	-1.29153	8.08518e-31	1.03347e-29	Down
HNRNPH1	-1.29048	5.10254e-38	1.18738e-36	Down
PRPF19	-1.28896	6.39768e-54	9.53254e-52	Down
PYHIN1	-1.28325	8.29037e-37	1.74342e-35	Down
SIT1	-1.28316	4.35754e-33	6.61114e-32	Down
CCND2	-1.28282	2.99747e-27	2.88282e-26	Down
CCT4	-1.27426	8.58471e-35	1.49028e-33	Down
CBLB	-1.27351	2.14127e-30	2.62931e-29	Down
RUNX2	-1.27236	7.37068e-20	4.33087e-19	Down
M6PR	-1.27135	4.05202e-45	1.91421e-43	Down
ZNF275	-1.27075	6.47936e-37	1.37918e-35	Down
BIN1	-1.26699	6.89476e-41	2.0364e-39	Down
ZNF395	-1.26329	7.02861e-36	1.33651e-34	Down
UTRN	-1.26271	5.22502e-32	7.22457e-31	Down
ATP5G2	-1.26205	1.08533e-45	5.44467e-44	Down
RPL3	-1.26182	1.88566e-31	2.52679e-30	Down
RTN1	-1.26022	3.27808e-25	2.78511e-24	Down
ZNF91	-1.25623	6.68323e-26	5.90431e-25	Down
BTN3A1	-1.253	5.40497e-21	3.4655e-20	Down
KARS	-1.25217	5.63028e-35	9.93058e-34	Down
SPN	-1.2521	1.48471e-47	9.0377e-46	Down
EEF2	-1.24999	2.08504e-35	3.79836e-34	Down
PQLC3	-1.24446	1.60171e-27	1.57226e-26	Down
EIF3D	-1.24408	5.73167e-57	1.30044e-54	Down
ICAM2	-1.24144	1.01133e-31	1.37549e-30	Down
CRTAM	-1.23724	3.24109e-33	4.96254e-32	Down
MAD1L1	-1.23252	1.69355e-30	2.11034e-29	Down
PJA1	-1.23002	6.13143e-66	5.10084e-63	Down
IKZF2	-1.22818	9.08374e-46	4.6032e-44	Down
UBE2L6	-1.22682	8.16534e-13	2.91228e-12	Down
RCC2	-1.22522	1.51667e-35	2.78838e-34	Down
CTCF	-1.22399	3.63702e-45	1.72897e-43	Down
LARS	-1.22067	2.54505e-37	5.58402e-36	Down
C6orf48	-1.22028	1.34084e-27	1.32926e-26	Down
TOMM20	-1.21968	3.08047e-32	4.32523e-31	Down
LEPROTL1	-1.21958	5.93643e-42	1.9954e-40	Down
NHP2	-1.2195	1.75239e-29	1.98571e-28	Down
GATA2	-1.2187	3.2081e-40	9.07264e-39	Down
CCDC109B	-1.21612	1.02944e-34	1.77801e-33	Down
VPS13C	-1.21323	1.83842e-28	1.92986e-27	Down
ST3GAL5	-1.21077	1.17156e-33	1.86237e-32	Down
MATK	-1.2076	1.86661e-33	2.90708e-32	Down
ZNF529	-1.20547	1.27428e-44	5.78234e-43	Down
SMAD3	-1.20508	7.53476e-48	4.85287e-46	Down
SF3A3	-1.20211	7.5962e-43	2.84018e-41	Down
DDHD2	-1.20065	8.20809e-52	8.90667e-50	Down
RPL19	-1.20045	4.3365e-40	1.1992e-38	Down
MORC2	-1.19965	3.64078e-44	1.51732e-42	Down
MAP3K4	-1.19845	3.64777e-44	1.51732e-42	Down
RPS5	-1.19807	3.74187e-26	3.37444e-25	Down
NAP1L1	-1.19668	3.34981e-25	2.84363e-24	Down
ZNF146	-1.19626	9.33573e-37	1.94569e-35	Down
CPPED1	-1.19473	6.40328e-23	4.67622e-22	Down
LY86	-1.19377	1.86941e-13	6.99487e-13	Down
ARHGEF3	-1.19366	7.24802e-43	2.72019e-41	Down
FN3KRP	-1.19229	2.16405e-39	5.67026e-38	Down
KCNA3	-1.19142	2.59437e-41	7.96912e-40	Down
MYOM2	-1.19056	2.10211e-14	8.41771e-14	Down
RHOH	-1.19056	6.09776e-20	3.60414e-19	Down
FXYD5	-1.18834	9.62502e-38	2.20382e-36	Down
NKTR	-1.18767	9.69411e-42	3.19394e-40	Down
THEM4	-1.18733	4.4108e-60	1.37603e-57	Down
PURA	-1.18708	1.64872e-41	5.20861e-40	Down
TTC39C	-1.18668	3.27578e-47	1.90129e-45	Down
PRKACB	-1.186	2.4109e-18	1.27075e-17	Down
NSA2	-1.1857	1.61335e-25	1.39447e-24	Down
MAGED1	-1.1853	2.42941e-41	7.52754e-40	Down
PRR5L	-1.18377	2.17113e-37	4.79522e-36	Down
HTATSF1	-1.18187	2.87766e-29	3.22421e-28	Down
SLC7A6	-1.18187	2.91378e-52	3.34348e-50	Down
FAM53B	-1.18058	1.6237e-38	3.96317e-37	Down
HOXB2	-1.18022	3.49194e-26	3.15761e-25	Down
BANK1	-1.17559	4.51835e-21	2.91575e-20	Down
FUS	-1.17471	6.74658e-43	2.54155e-41	Down
ANKRD36	-1.16939	8.30905e-25	6.85531e-24	Down
IFIT3	-1.16576	0.000349298	0.000558553	Down
GPRASP1	-1.16554	1.30615e-32	1.90078e-31	Down
KRT23	-1.16174	2.89896e-07	6.54019e-07	Down
ERP29	-1.16162	6.43069e-37	1.37174e-35	Down
NLRP1	-1.15992	1.9492e-22	1.38399e-21	Down
APRT	-1.15949	3.06934e-28	3.2018e-27	Down
RPL29	-1.15856	8.67916e-33	1.27982e-31	Down
PPP3CC	-1.1585	2.29564e-38	5.50898e-37	Down
ZAP70	-1.15757	2.45316e-44	1.04658e-42	Down
UBAP2	-1.15578	2.57379e-37	5.63468e-36	Down
SATB1	-1.15453	2.41835e-35	4.38156e-34	Down
GLOD4	-1.15304	5.09156e-53	6.51654e-51	Down
OXNAD1	-1.15269	7.04195e-49	5.49217e-47	Down
ID2	-1.14914	2.95307e-20	1.80419e-19	Down
MX1	-1.14848	0.000173892	0.000288367	Down
WDR54	-1.14811	5.49758e-39	1.40006e-37	Down
CRTC3	-1.14744	5.86673e-26	5.21992e-25	Down
IRF8	-1.14218	8.90689e-31	1.1356e-29	Down
RPS19	-1.14215	2.53549e-30	3.09435e-29	Down
CHST7	-1.14208	3.67608e-24	2.93352e-23	Down
TRANK1	-1.14071	1.37908e-15	5.98581e-15	Down
TAF4	-1.14033	1.1126e-36	2.29485e-35	Down
PRPF8	-1.13787	5.72402e-41	1.70576e-39	Down
SEC31A	-1.13752	1.88007e-36	3.83036e-35	Down
MPHOSPH10	-1.13548	1.46865e-28	1.55148e-27	Down
LIPA	-1.13525	3.76942e-17	1.82317e-16	Down
RNASE6	-1.13455	1.1151e-11	3.67759e-11	Down
LRRC47	-1.13344	3.37381e-48	2.32281e-46	Down
SLAMF6	-1.13253	3.5917e-25	3.04121e-24	Down
PAQR8	-1.13216	2.67701e-48	1.89536e-46	Down
ZNHIT6	-1.13094	3.19652e-48	2.21603e-46	Down
TNFRSF25	-1.12837	1.03383e-53	1.47438e-51	Down
RCAN3	-1.12784	4.18734e-33	6.36258e-32	Down
XRCC6	-1.12727	2.28476e-44	9.78916e-43	Down
PAPD7	-1.12689	2.22103e-41	6.92891e-40	Down
ALDH1A1	-1.12614	2.37605e-32	3.37816e-31	Down
JAK1	-1.12517	1.74507e-42	6.31197e-41	Down
DDX18	-1.12459	5.92844e-49	4.85111e-47	Down
IFIH1	-1.12413	6.77522e-07	1.46432e-06	Down
LAX1	-1.12263	9.83598e-31	1.25086e-29	Down
TTC9	-1.12095	1.76058e-24	1.43243e-23	Down
TOMM70A	-1.12089	7.6735e-32	1.05371e-30	Down
CIRH1A	-1.12056	1.53482e-33	2.41674e-32	Down
IL27RA	-1.1204	4.71394e-33	7.14102e-32	Down
LYAR	-1.11931	5.98423e-31	7.70847e-30	Down
TNFRSF10B	-1.11759	1.40785e-23	1.08029e-22	Down
REPS1	-1.11545	1.45771e-35	2.68494e-34	Down
CYP27A1	-1.11164	3.41962e-12	1.17192e-11	Down
RPLP2	-1.10931	1.92954e-41	6.06764e-40	Down
HSPA9	-1.10735	1.70959e-38	4.15253e-37	Down
MTR	-1.10637	1.04298e-47	6.50755e-46	Down
BTBD11	-1.10634	6.37827e-49	5.13502e-47	Down
EIF3E	-1.10504	3.42493e-26	3.10264e-25	Down
OSGEPL1	-1.10332	8.38184e-55	1.44269e-52	Down
CXCR4	-1.10309	2.57043e-22	1.81091e-21	Down
NR1D2	-1.10169	2.63576e-45	1.28984e-43	Down
GIMAP1	-1.09827	1.56215e-30	1.95671e-29	Down
AKAP11	-1.09619	3.08983e-20	1.88659e-19	Down
EIF3A	-1.09598	2.56048e-44	1.08771e-42	Down
RELL1	-1.09468	1.27961e-14	5.1865e-14	Down
INPP4B	-1.08932	3.71219e-54	5.79044e-52	Down
NOSIP	-1.08781	2.44887e-35	4.42881e-34	Down
UTP3	-1.08656	2.05884e-34	3.48954e-33	Down
DDX27	-1.0854	8.44996e-36	1.59765e-34	Down
CALHM2	-1.08401	4.20595e-23	3.13343e-22	Down
PCYOX1L	-1.08323	1.09764e-29	1.26242e-28	Down
MOAP1	-1.08143	1.19852e-25	1.04405e-24	Down
NHP2L1	-1.0812	5.48664e-40	1.50476e-38	Down
RRAS2	-1.08011	1.93288e-21	1.28297e-20	Down
BCL9L	-1.07236	4.95223e-40	1.36569e-38	Down
XYLT1	-1.07224	2.16309e-27	2.10059e-26	Down
TXNIP	-1.07096	7.5228e-21	4.76826e-20	Down
CCT6A	-1.07078	9.79063e-28	9.81324e-27	Down
TMEM203	-1.06662	1.96928e-37	4.36873e-36	Down
NUDT9	-1.0663	1.03966e-28	1.11243e-27	Down
CHCHD10	-1.06488	1.44323e-26	1.33828e-25	Down
CD1D	-1.06434	9.57065e-17	4.48773e-16	Down
OCIAD2	-1.06303	3.47183e-35	6.16712e-34	Down
ESYT2	-1.06229	1.15369e-35	2.1568e-34	Down
RPS28	-1.06074	1.65968e-44	7.33125e-43	Down
SLC20A1	-1.05996	1.22101e-36	2.51327e-35	Down
MRPS6	-1.05664	1.25186e-28	1.32668e-27	Down
PRPS1	-1.05631	2.82195e-44	1.19017e-42	Down
CIB1	-1.05628	1.47859e-39	3.92573e-38	Down
DDX21	-1.05557	1.17675e-27	1.17357e-26	Down
PIK3IP1	-1.05549	1.67178e-38	4.07059e-37	Down
MRI1	-1.05511	3.74744e-41	1.1371e-39	Down
PPP1CC	-1.05495	3.5319e-29	3.91767e-28	Down
TTC19	-1.05449	6.09002e-43	2.31166e-41	Down
PPM1K	-1.0528	4.66394e-19	2.58237e-18	Down
EPRS	-1.05102	3.35357e-34	5.5705e-33	Down
CEP78	-1.05034	2.37889e-32	3.37816e-31	Down
NARS	-1.0481	2.25853e-35	4.1069e-34	Down
CLSTN1	-1.04725	5.12057e-39	1.30738e-37	Down
MID1IP1	-1.04587	2.632e-26	2.40396e-25	Down
DPYSL2	-1.04572	4.72177e-20	2.8226e-19	Down
ENOPH1	-1.04568	2.90875e-19	1.63687e-18	Down
HSPD1	-1.04499	8.93605e-16	3.93683e-15	Down
SCRN1	-1.04382	4.31979e-39	1.11145e-37	Down
RRS1	-1.04235	5.47347e-31	7.07794e-30	Down
TAF15	-1.04234	3.22576e-45	1.55569e-43	Down
IRF1	-1.04193	3.29886e-20	2.01053e-19	Down
UHRF2	-1.04159	1.92617e-26	1.77225e-25	Down
C21orf59	-1.03847	8.84413e-30	1.02903e-28	Down
LDLRAP1	-1.03823	2.94808e-19	1.65713e-18	Down
CCT8	-1.03638	3.20811e-29	3.58239e-28	Down
IL11RA	-1.03546	1.09323e-51	1.14881e-49	Down
RNF44	-1.03409	1.43959e-32	2.08281e-31	Down
FNBP4	-1.03304	1.17074e-42	4.2655e-41	Down
ALDH9A1	-1.03273	2.34648e-40	6.69283e-39	Down
MRPS18B	-1.03242	5.9589e-51	5.88987e-49	Down
NUCKS1	-1.03182	3.84606e-34	6.33584e-33	Down
TRIM44	-1.03075	8.08845e-42	2.69157e-40	Down
RPL12	-1.02934	8.36779e-28	8.41245e-27	Down
RPS15	-1.02919	3.92433e-30	4.69181e-29	Down
PECAM1	-1.02893	5.70176e-23	4.1946e-22	Down
VPREB3	-1.02853	2.24231e-20	1.37924e-19	Down
PDE4B	-1.02843	3.05006e-17	1.48313e-16	Down
S100A10	-1.02824	3.58051e-17	1.73432e-16	Down
CCR5	-1.02804	3.7981e-29	4.2036e-28	Down
ZNF664	-1.028	2.56776e-29	2.88022e-28	Down
IMMT	-1.02555	6.63468e-43	2.50887e-41	Down
NAAA	-1.02514	1.37324e-29	1.57213e-28	Down
AHNAK	-1.02498	4.59253e-20	2.74864e-19	Down
AGK	-1.02449	1.68992e-33	2.65259e-32	Down
OGFOD1	-1.02448	2.43553e-41	7.52754e-40	Down
SDR39U1	-1.02379	3.62232e-36	7.14657e-35	Down
CCDC115	-1.02374	2.55846e-38	6.11032e-37	Down
ZBTB4	-1.02361	2.42689e-38	5.80998e-37	Down
RANGRF	-1.02123	8.24326e-32	1.12729e-30	Down
WDR11	-1.0211	2.96136e-21	1.93985e-20	Down
SMS	-1.02104	3.35001e-29	3.72833e-28	Down
BLCAP	-1.02087	1.21036e-53	1.6552e-51	Down
TOP2B	-1.01989	1.94217e-44	8.46665e-43	Down
IKZF3	-1.01951	3.71285e-27	3.54693e-26	Down
TTYH2	-1.01878	5.93353e-30	6.98519e-29	Down
SSBP2	-1.01873	1.54497e-48	1.13407e-46	Down
MEF2C	-1.0183	4.8437e-26	4.3251e-25	Down
MIF	-1.01775	2.0105e-19	1.1456e-18	Down
JARID2	-1.01715	1.20026e-29	1.37726e-28	Down
ITGB7	-1.01493	4.27689e-40	1.18601e-38	Down
RPS25	-1.0149	2.65518e-34	4.43998e-33	Down
MGA	-1.01352	1.94426e-39	5.12126e-38	Down
HIGD2A	-1.01272	5.77212e-35	1.01628e-33	Down
GAR1	-1.01243	2.77079e-34	4.62555e-33	Down
CRY1	-1.01142	8.31771e-28	8.37053e-27	Down
EIF3M	-1.01101	3.0886e-31	4.0839e-30	Down
PUF60	-1.0105	5.29675e-41	1.58316e-39	Down
SMARCE1	-1.0102	6.17976e-34	1.0064e-32	Down
EIF4B	-1.0079	3.9522e-42	1.36051e-40	Down
EIF3H	-1.00777	3.20296e-35	5.70984e-34	Down
AGPAT5	-1.00772	1.59187e-26	1.47281e-25	Down
PARN	-1.00759	6.09118e-30	7.16234e-29	Down
C16orf80	-1.00589	2.07711e-44	8.93782e-43	Down
KLF2	-1.00432	2.06553e-44	8.92648e-43	Down
RPL8	-1.00138	4.13334e-25	3.49096e-24	Down
HIP1	1.0014	2.17815e-31	2.90314e-30	Up
MCTP1	1.00193	8.63982e-26	7.59255e-25	Up
RALGAPA2	1.00242	8.29537e-37	1.74342e-35	Up
PLBD1	1.00374	1.62475e-30	2.03257e-29	Up
GRK6	1.00398	1.29317e-33	2.04916e-32	Up
UBE2H	1.00423	6.21085e-19	3.41614e-18	Up
PSMC6	1.00452	7.17298e-14	2.76906e-13	Up
ALPK1	1.00459	1.14583e-30	1.44979e-29	Up
ACAP1	1.00549	2.69159e-16	1.2236e-15	Up
FSTL1	1.00642	5.62673e-12	1.89705e-11	Up
PTX3	1.00874	4.55328e-10	1.32794e-09	Up
NARF	1.00875	2.20223e-30	2.70085e-29	Up
ASGR2	1.00928	1.75764e-16	8.09715e-16	Up
CD63	1.01064	3.40356e-31	4.47665e-30	Up
OSBPL1A	1.0114	1.48583e-13	5.60162e-13	Up
ITGA2B	1.01338	2.01595e-16	9.24871e-16	Up
LPCAT2	1.01356	6.50476e-23	4.74686e-22	Up
FNDC3B	1.0165	1.36358e-34	2.32694e-33	Up
SAMD8	1.01796	6.95109e-28	7.03067e-27	Up
FAM105A	1.01832	1.52248e-32	2.1872e-31	Up
CTDP1	1.01884	9.36345e-20	5.45046e-19	Up
DCUN1D1	1.01913	1.71093e-17	8.45553e-17	Up
TFRC	1.021	2.06991e-09	5.70827e-09	Up
ACSL1	1.02209	8.61126e-29	9.24368e-28	Up
CEACAM6	1.02274	6.85085e-09	1.7913e-08	Up
MTF1	1.02587	6.24401e-34	1.01521e-32	Up
TRPS1	1.02881	1.05995e-21	7.15448e-21	Up
GK	1.02898	2.94831e-14	1.16937e-13	Up
FAM160A2	1.03059	1.72954e-27	1.69607e-26	Up
EXT1	1.03106	2.99078e-22	2.08846e-21	Up
C2orf88	1.03223	1.56529e-11	5.10996e-11	Up
IFT20	1.03402	1.99705e-34	3.39635e-33	Up
SFT2D2	1.03536	5.05925e-21	3.25219e-20	Up
EIF4E3	1.03951	4.07061e-31	5.30507e-30	Up
ENY2	1.04138	4.76581e-28	4.8998e-27	Up
C1QB	1.042	1.47254e-10	4.47499e-10	Up
DPH3	1.04244	3.46278e-39	8.97894e-38	Up
GTDC1	1.04257	4.23637e-30	5.05881e-29	Up
DIRC2	1.04401	3.36755e-34	5.58443e-33	Up
SIGLEC5	1.04474	2.7072e-19	1.52775e-18	Up
CEACAM4	1.04538	2.30922e-17	1.13506e-16	Up
PCYT1A	1.04609	2.45848e-30	3.00404e-29	Up
GYPB	1.04751	9.0699e-10	2.57742e-09	Up
KBTBD7	1.04891	3.09119e-12	1.06265e-11	Up
NDUFB1	1.04934	8.67975e-24	6.72226e-23	Up
B3GNT8	1.04982	3.48288e-21	2.26807e-20	Up
ARL8A	1.05368	4.33891e-44	1.77522e-42	Up
PDZD8	1.05588	9.57361e-30	1.10745e-28	Up
ACVR1B	1.05635	5.05853e-38	1.17989e-36	Up
PPP1R3B	1.05676	1.12642e-21	7.58267e-21	Up
ENTPD1	1.05697	6.90326e-33	1.02431e-31	Up
CASP5	1.05896	3.67679e-11	1.16785e-10	Up
FURIN	1.06088	4.52492e-24	3.57375e-23	Up
CORO2A	1.06981	3.2596e-23	2.4485e-22	Up
MTX1	1.07035	1.46358e-39	3.89624e-38	Up
HEBP2	1.07104	6.70354e-47	3.71786e-45	Up
AGPAT2	1.07238	8.04418e-39	2.0279e-37	Up
WFDC1	1.07307	4.28543e-09	1.14389e-08	Up
ACSL4	1.07347	1.27228e-27	1.26506e-26	Up
STK3	1.0736	4.08765e-21	2.64809e-20	Up
HIST2H2BE	1.07456	7.03116e-19	3.84403e-18	Up
EVI2A	1.07577	3.73872e-14	1.47583e-13	Up
ANKRD9	1.07662	4.74406e-14	1.85871e-13	Up
CHCHD7	1.07698	4.15716e-17	2.00271e-16	Up
PDGFC	1.07767	2.77623e-17	1.35328e-16	Up
LAIR1	1.07854	9.36019e-14	3.58156e-13	Up
CEACAM21	1.08215	3.81113e-20	2.30585e-19	Up
ABCC13	1.08232	6.60605e-08	1.5762e-07	Up
SFXN1	1.08272	6.23444e-15	2.59219e-14	Up
SAP30	1.08587	2.94791e-22	2.06374e-21	Up
MARCO	1.0879	2.12468e-13	7.90853e-13	Up
SEMA4A	1.09212	2.19025e-23	1.66656e-22	Up
PAG1	1.09313	1.811e-31	2.43327e-30	Up
VSIG4	1.09824	2.3084e-09	6.33271e-09	Up
ROMO1	1.09919	5.49001e-17	2.62611e-16	Up
MGST1	1.10114	1.40073e-20	8.75061e-20	Up
TIFA	1.10273	9.12169e-18	4.61072e-17	Up
EMILIN2	1.10756	1.20313e-20	7.55877e-20	Up
MYL9	1.11096	7.69148e-15	3.17946e-14	Up
LDHA	1.11096	1.94486e-23	1.48324e-22	Up
COMMD6	1.11146	3.20728e-13	1.17931e-12	Up
TMEM158	1.11172	1.20011e-07	2.79727e-07	Up
WSB1	1.11184	1.93195e-30	2.38401e-29	Up
SESN3	1.11495	1.02572e-08	2.64049e-08	Up
MGAM	1.11797	3.51162e-21	2.2853e-20	Up
JMJD6	1.1192	6.21778e-33	9.29223e-32	Up
COMMD8	1.12148	2.15496e-16	9.85929e-16	Up
HAT1	1.12342	2.08157e-21	1.37618e-20	Up
TGFA	1.12422	1.00671e-15	4.41758e-15	Up
GNG11	1.1284	2.38395e-10	7.12758e-10	Up
SNX3	1.12925	3.94181e-31	5.14393e-30	Up
IER3	1.12957	1.44207e-20	9.00325e-20	Up
PF4V1	1.131	1.63526e-07	3.77017e-07	Up
MSL3	1.1325	1.30147e-36	2.67338e-35	Up
SLC36A4	1.13991	3.57882e-19	2.00266e-18	Up
FCGR1A	1.14031	4.07327e-26	3.65679e-25	Up
GJB6	1.14115	1.06205e-08	2.73037e-08	Up
PCMT1	1.14264	1.07828e-36	2.23794e-35	Up
SESN2	1.14368	8.97077e-17	4.21635e-16	Up
NSUN3	1.14689	1.13915e-18	6.12722e-18	Up
GALNT2	1.14771	1.79939e-23	1.3765e-22	Up
LGALS8	1.15049	3.42463e-25	2.90468e-24	Up
TMCO3	1.15363	6.84577e-20	4.03193e-19	Up
SLC11A1	1.15416	1.95524e-25	1.68269e-24	Up
C1GALT1C1	1.15427	1.95933e-24	1.59024e-23	Up
MTHFD2	1.15608	4.39003e-21	2.83661e-20	Up
HIST1H1C	1.15763	6.88298e-13	2.46813e-12	Up
SH3GLB1	1.15795	2.54559e-42	9.04362e-41	Up
CDADC1	1.1581	5.68942e-18	2.9262e-17	Up
MXD3	1.16501	4.62082e-38	1.0854e-36	Up
SLCO4C1	1.16557	6.63192e-25	5.52181e-24	Up
FES	1.17006	1.06843e-29	1.23024e-28	Up
AGTPBP1	1.17133	3.28865e-29	3.66413e-28	Up
CHPT1	1.17226	4.94974e-21	3.1859e-20	Up
LILRA3	1.17556	3.74813e-09	1.00585e-08	Up
IL4R	1.18807	1.85464e-30	2.29998e-29	Up
LIMK2	1.1884	2.22859e-32	3.17829e-31	Up
RPS27L	1.18847	3.52453e-16	1.58707e-15	Up
RSL24D1	1.19245	5.1114e-17	2.4497e-16	Up
CARD16	1.19833	3.16546e-30	3.8304e-29	Up
JAK2	1.20094	1.01406e-26	9.46112e-26	Up
IL1RN	1.20751	2.13173e-24	1.72876e-23	Up
ERI1	1.20788	1.481e-20	9.22636e-20	Up
NDST2	1.21151	1.18473e-27	1.18035e-26	Up
CHMP5	1.21422	7.98851e-20	4.68013e-19	Up
KL	1.21768	2.26516e-16	1.0354e-15	Up
ALAS2	1.21854	8.63216e-09	2.23773e-08	Up
CLEC4E	1.22033	1.68492e-26	1.55746e-25	Up
PPM1M	1.22214	1.24626e-30	1.56891e-29	Up
PHTF1	1.22489	1.36407e-33	2.15127e-32	Up
TSPAN2	1.22979	1.04152e-19	6.03805e-19	Up
HBD	1.23128	1.13235e-06	2.38739e-06	Up
RHOU	1.23155	8.51411e-24	6.60422e-23	Up
BST1	1.23222	2.50913e-34	4.22406e-33	Up
FGF13	1.233	1.70058e-13	6.38229e-13	Up
SPTLC2	1.23341	3.05349e-27	2.93105e-26	Up
CSGALNACT2	1.23782	1.30217e-17	6.50629e-17	Up
PLEK2	1.23997	7.26018e-09	1.89486e-08	Up
ANXA1	1.24044	4.83709e-31	6.27941e-30	Up
HGF	1.24113	8.66389e-17	4.0798e-16	Up
CPEB4	1.24263	1.54455e-33	2.42823e-32	Up
GRAMD1A	1.24286	7.30956e-29	7.94894e-28	Up
ITGA7	1.24528	1.40376e-15	6.085e-15	Up
MPO	1.24542	7.46347e-10	2.13673e-09	Up
FAM20A	1.25147	1.31159e-19	7.5598e-19	Up
TFDP1	1.2546	2.93974e-15	1.24989e-14	Up
PLIN5	1.25483	1.84194e-24	1.4974e-23	Up
AZI2	1.25488	3.31531e-30	3.99719e-29	Up
ZNF354A	1.25593	1.15077e-13	4.37144e-13	Up
SIAH2	1.26144	3.6072e-13	1.32258e-12	Up
ARL4A	1.26184	5.04611e-23	3.7315e-22	Up
ETS2	1.26261	3.52361e-29	3.91282e-28	Up
MAFG	1.26347	3.78369e-44	1.56733e-42	Up
TMTC1	1.2646	7.70359e-15	3.18315e-14	Up
SERPINB2	1.26616	1.36252e-16	6.32948e-16	Up
PPP4R2	1.2705	4.86471e-32	6.74506e-31	Up
XK	1.27075	3.08212e-13	1.13622e-12	Up
CD58	1.27466	1.36094e-35	2.52064e-34	Up
ACER3	1.27853	1.78779e-30	2.21984e-29	Up
SIGLEC9	1.27967	2.52536e-31	3.35694e-30	Up
TXNDC17	1.27998	7.99436e-42	2.66915e-40	Up
ITPKC	1.28061	2.90411e-21	1.90609e-20	Up
GGH	1.28889	5.79398e-20	3.43679e-19	Up
ADM	1.28898	1.24594e-29	1.42804e-28	Up
MEF2A	1.29078	5.28734e-36	1.02096e-34	Up
FCER1G	1.29313	2.86706e-47	1.6936e-45	Up
CISD2	1.29513	1.91857e-12	6.70158e-12	Up
VSTM1	1.29861	7.94118e-15	3.27861e-14	Up
SELP	1.30366	4.68187e-17	2.24707e-16	Up
FLOT2	1.30491	2.37235e-34	4.01409e-33	Up
PDSS1	1.30632	5.86102e-26	5.2195e-25	Up
ST3GAL4	1.30675	2.15965e-31	2.88232e-30	Up
ANKRD55	1.32093	1.20795e-15	5.27513e-15	Up
NBEAL2	1.32351	2.9688e-22	2.07546e-21	Up
GAS7	1.32683	7.22869e-34	1.16394e-32	Up
CHIT1	1.32998	2.44226e-10	7.29753e-10	Up
PADI4	1.33015	2.63736e-23	1.99008e-22	Up
P2RX1	1.33235	1.28797e-25	1.12002e-24	Up
NDUFA4	1.33596	5.0207e-26	4.47915e-25	Up
FEM1C	1.33741	7.70301e-28	7.76759e-27	Up
STXBP2	1.33952	2.77528e-30	3.37873e-29	Up
S100A8	1.34188	5.22733e-76	1.73948e-72	Up
ENTPD7	1.34432	4.37773e-18	2.27146e-17	Up
COL17A1	1.34539	3.47289e-15	1.47156e-14	Up
FLOT1	1.34741	6.59442e-49	5.22477e-47	Up
MCTP2	1.34776	3.51265e-39	9.08465e-38	Up
FGD4	1.36494	1.85028e-49	1.55222e-47	Up
CCNA1	1.36529	1.01272e-11	3.351e-11	Up
GLRX	1.3696	1.27106e-34	2.18024e-33	Up
PPP1R3D	1.37349	4.7865e-44	1.95035e-42	Up
CD55	1.37399	6.30583e-48	4.08773e-46	Up
G0S2	1.37498	9.38666e-17	4.40353e-16	Up
SLC37A3	1.37513	1.88637e-30	2.33353e-29	Up
CDKN2C	1.37826	4.49073e-29	4.94277e-28	Up
CMTM5	1.38056	1.00129e-13	3.82106e-13	Up
SAR1B	1.38201	4.76565e-26	4.26303e-25	Up
SRPK1	1.39079	3.59032e-48	2.45494e-46	Up
KLHL2	1.39505	7.91664e-19	4.30691e-18	Up
SLC25A40	1.39742	9.90892e-21	6.25685e-20	Up
C5orf30	1.40233	4.37683e-16	1.95937e-15	Up
C3AR1	1.40584	6.87616e-19	3.76548e-18	Up
OSM	1.40671	8.75058e-33	1.28845e-31	Up
LRRN1	1.4072	1.00216e-20	6.31602e-20	Up
PCOLCE2	1.40845	2.15818e-12	7.50702e-12	Up
ISCA1	1.41772	5.2836e-13	1.91179e-12	Up
PDCD10	1.41805	1.19332e-29	1.37088e-28	Up
CAMP	1.4239	1.63109e-10	4.93878e-10	Up
PPBP	1.42534	2.42499e-16	1.10694e-15	Up
RBX1	1.42816	2.42317e-25	2.06756e-24	Up
CARD6	1.43515	6.28432e-48	4.08773e-46	Up
EXOC6	1.43532	3.50039e-37	7.56372e-36	Up
TREML1	1.43852	5.77396e-12	1.94406e-11	Up
TXN	1.44139	5.42077e-52	6.0804e-50	Up
UBE2J1	1.44551	8.66908e-37	1.81451e-35	Up
UBE2F	1.44777	6.57937e-45	3.04083e-43	Up
ZDHHC3	1.45473	1.17417e-53	1.64707e-51	Up
CTSD	1.45617	2.03172e-25	1.7455e-24	Up
HMGB2	1.4599	1.00917e-55	1.93742e-53	Up
RAB32	1.46147	1.1546e-52	1.35604e-50	Up
NTNG2	1.46795	1.88622e-25	1.62469e-24	Up
TPST1	1.46965	1.60804e-18	8.57993e-18	Up
DRAM1	1.47234	7.45859e-37	1.57752e-35	Up
LMNB1	1.48096	1.04366e-32	1.52769e-31	Up
PECR	1.48779	2.12787e-32	3.04334e-31	Up
DUSP13	1.49212	2.08154e-20	1.28509e-19	Up
ASPH	1.49371	9.70031e-36	1.82369e-34	Up
ATP8B4	1.49373	5.45383e-17	2.61005e-16	Up
ERLIN1	1.49595	2.70016e-33	4.15984e-32	Up
FAR2	1.49896	5.552e-23	4.09045e-22	Up
APOBEC3B	1.50224	3.46367e-05	6.23136e-05	Up
WIPI1	1.50228	7.00528e-36	1.33461e-34	Up
F5	1.50514	2.30468e-30	2.81957e-29	Up
RAB13	1.51325	9.96749e-31	1.26436e-29	Up
CLEC5A	1.51335	6.46924e-26	5.72539e-25	Up
DYSF	1.51345	1.83397e-37	4.07762e-36	Up
CLU	1.51995	4.24952e-20	2.55714e-19	Up
FBXO30	1.52189	3.80939e-32	5.31134e-31	Up
LTB4R	1.52288	2.69428e-42	9.47076e-41	Up
BLOC1S1	1.52426	4.23803e-40	1.1785e-38	Up
CDKN2D	1.52806	2.18074e-53	2.94194e-51	Up
LRG1	1.52854	3.30003e-35	5.87241e-34	Up
THBS1	1.5287	4.99394e-19	2.76355e-18	Up
TSPO	1.52914	8.39086e-34	1.34672e-32	Up
TMEM120A	1.53885	9.11113e-33	1.33956e-31	Up
NFE2	1.54004	1.19795e-37	2.69826e-36	Up
OSCAR	1.54072	1.04831e-45	5.28549e-44	Up
SLC22A4	1.54226	6.44973e-49	5.15102e-47	Up
AHSP	1.54647	1.00188e-11	3.31735e-11	Up
WDFY3	1.54906	1.08485e-36	2.2469e-35	Up
CAPG	1.55697	9.55576e-31	1.21677e-29	Up
RAB20	1.56551	5.9609e-24	4.65267e-23	Up
MBOAT2	1.56815	6.74415e-64	4.48845e-61	Up
QSOX1	1.56995	1.16596e-50	1.13008e-48	Up
HIST1H2BD	1.57079	1.10975e-27	1.10787e-26	Up
SERPINB1	1.57358	8.4695e-62	3.84323e-59	Up
GCLM	1.58066	3.40678e-50	3.1785e-48	Up
ADAM9	1.58336	2.04068e-40	5.85404e-39	Up
NLRC4	1.58875	3.13463e-46	1.62984e-44	Up
S100P	1.59298	2.84572e-24	2.28551e-23	Up
ELANE	1.59356	1.14613e-10	3.51084e-10	Up
PSTPIP2	1.5942	2.13139e-38	5.12716e-37	Up
EMR1	1.59622	2.61586e-20	1.60307e-19	Up
DHRS13	1.60329	5.85233e-28	5.97381e-27	Up
POR	1.60606	1.73724e-40	5.02692e-39	Up
MS4A3	1.6122	8.74899e-09	2.26618e-08	Up
KREMEN1	1.61496	1.16517e-24	9.55002e-24	Up
MKNK1	1.62069	1.02207e-42	3.76507e-41	Up
NDUFB3	1.62261	6.07503e-49	4.93065e-47	Up
METTL9	1.63073	9.99474e-52	1.06146e-49	Up
BATF	1.63163	5.24222e-35	9.27891e-34	Up
DAAM2	1.64773	4.27309e-15	1.7969e-14	Up
ROPN1L	1.65066	3.23695e-38	7.65747e-37	Up
TNFAIP6	1.66274	2.10163e-27	2.04489e-26	Up
ZNF438	1.67344	2.01073e-47	1.20922e-45	Up
NUDT4	1.67665	2.44517e-15	1.04317e-14	Up
RABGEF1	1.67745	9.59261e-44	3.8459e-42	Up
TFF3	1.68516	8.00588e-15	3.30259e-14	Up
ATP6V1C1	1.68627	7.10705e-36	1.34885e-34	Up
AGFG1	1.6892	3.02026e-42	1.04692e-40	Up
GALNT14	1.68944	2.28028e-28	2.38367e-27	Up
PLSCR1	1.69307	1.01163e-33	1.61586e-32	Up
NAIP	1.69631	2.41985e-32	3.43144e-31	Up
PFKFB3	1.70391	9.87049e-43	3.64952e-41	Up
ACN9	1.71272	1.46416e-32	2.11224e-31	Up
AIM2	1.71363	1.47051e-21	9.84579e-21	Up
NQO2	1.72408	7.09535e-29	7.74976e-28	Up
SLC26A8	1.72723	2.4455e-36	4.91215e-35	Up
ORM1	1.72825	2.45517e-16	1.11917e-15	Up
SLPI	1.72908	3.73399e-20	2.26329e-19	Up
BPGM	1.73103	1.56785e-12	5.49958e-12	Up
DEFA4	1.73997	7.70023e-08	1.82419e-07	Up
KIF1B	1.76529	4.67392e-48	3.13153e-46	Up
MAPK14	1.77198	3.32509e-61	1.3831e-58	Up
ST6GALNAC3	1.77853	2.21223e-28	2.31496e-27	Up
GPR97	1.78618	1.9328e-41	6.06764e-40	Up
FUT7	1.7879	6.53822e-28	6.6265e-27	Up
CA1	1.79181	4.65825e-20	2.7863e-19	Up
TBC1D8	1.79381	3.21211e-38	7.61674e-37	Up
IFI27	1.80141	1.72457e-07	3.96418e-07	Up
ATP11B	1.80237	3.1677e-47	1.84931e-45	Up
FKBP5	1.8026	1.15458e-46	6.16374e-45	Up
CST7	1.81072	1.43327e-41	4.58602e-40	Up
CKAP4	1.82297	5.48111e-60	1.65812e-57	Up
MAP2K6	1.82561	1.59982e-44	7.12991e-43	Up
PGS1	1.83406	1.05741e-58	2.77794e-56	Up
IL1R1	1.84007	8.69058e-41	2.53678e-39	Up
CNIH4	1.86392	7.52137e-57	1.6323e-54	Up
CD163	1.86468	3.78785e-17	1.8303e-16	Up
PGD	1.87057	1.30949e-44	5.88858e-43	Up
CD24	1.88451	2.09838e-13	7.81645e-13	Up
CLEC1B	1.90159	3.00215e-22	2.09437e-21	Up
NSUN7	1.91424	7.17767e-34	1.15759e-32	Up
CYP1B1	1.92444	1.19703e-30	1.51073e-29	Up
MS4A4A	1.93004	7.43596e-29	8.07761e-28	Up
GRINA	1.93261	2.63623e-47	1.57029e-45	Up
SIPA1L2	1.93269	6.95803e-31	8.90538e-30	Up
METTL7B	1.93946	2.28237e-21	1.50694e-20	Up
IL18RAP	1.93949	2.66449e-48	1.89536e-46	Up
LY96	1.97064	6.97576e-35	1.22174e-33	Up
CR1	1.9721	3.60981e-47	2.07108e-45	Up
LIN7A	1.9806	2.92554e-50	2.80823e-48	Up
SOCS3	1.99334	5.84684e-43	2.23636e-41	Up
FCGR1B	2.00719	2.03877e-34	3.46141e-33	Up
GPR160	2.00744	8.01725e-39	2.02623e-37	Up
TP53I3	2.04646	6.59157e-33	9.82144e-32	Up
SMPDL3A	2.05355	6.32129e-22	4.32229e-21	Up
RNASE3	2.05665	8.45605e-21	5.35639e-20	Up
EMB	2.06874	3.5739e-37	7.70588e-36	Up
ATP9A	2.07787	2.73125e-26	2.49005e-25	Up
UPP1	2.10484	1.73948e-70	2.81635e-67	Up
SORT1	2.11087	2.83927e-42	9.94541e-41	Up
ECHDC3	2.13305	1.54699e-27	1.52756e-26	Up
CD59	2.15225	1.33396e-54	2.1831e-52	Up
COX7B	2.15784	1.31276e-34	2.24406e-33	Up
LILRA6	2.16204	4.32731e-48	2.91889e-46	Up
DHRS9	2.17639	1.31794e-25	1.14508e-24	Up
B3GNT5	2.18156	8.09987e-30	9.43535e-29	Up
TDRD9	2.20958	1.04444e-27	1.04475e-26	Up
DACH1	2.21062	1.42535e-39	3.81483e-38	Up
YOD1	2.2344	7.67005e-30	8.9451e-29	Up
CDK5RAP2	2.23781	4.45063e-36	8.66094e-35	Up
DDAH2	2.24229	3.45715e-54	5.47822e-52	Up
IDI1	2.26138	4.15949e-29	4.59338e-28	Up
HK3	2.26448	2.58996e-57	6.01292e-55	Up
PFKFB2	2.26696	1.79502e-29	2.02711e-28	Up
OPLAH	2.28182	1.13285e-41	3.69584e-40	Up
SULT1B1	2.30743	3.07862e-50	2.92704e-48	Up
STOM	2.37865	2.57178e-42	9.10427e-41	Up
GRB10	2.42539	9.97508e-49	7.6601e-47	Up
FOLR3	2.43702	7.80457e-26	6.87063e-25	Up
UGCG	2.46718	5.18647e-45	2.43082e-43	Up
RNASE2	2.46796	1.05013e-43	4.17669e-42	Up
HPGD	2.4915	5.82748e-21	3.72682e-20	Up
IRAK3	2.50976	3.00278e-62	1.49884e-59	Up
TLR5	2.51058	3.75343e-48	2.54901e-46	Up
EXOSC4	2.5149	3.56774e-39	9.20329e-38	Up
OLAH	2.51561	4.71159e-24	3.71531e-23	Up
MMP9	2.54067	3.95609e-32	5.50051e-31	Up
CRISP3	2.5448	4.29725e-20	2.5843e-19	Up
ALPL	2.57782	1.35183e-35	2.50843e-34	Up
IL18R1	2.57788	2.00404e-43	7.8765e-42	Up
LILRA5	2.58023	8.11621e-60	2.38306e-57	Up
S100A12	2.65423	3.86423e-79	1.92883e-75	Up
CEACAM1	2.67779	3.44895e-34	5.70993e-33	Up
GYG1	2.72996	2.39699e-56	4.98523e-54	Up
CEACAM8	2.73183	6.97151e-21	4.43856e-20	Up
FCAR	2.75968	1.03538e-59	2.91733e-57	Up
SAMSN1	2.77376	1.36071e-49	1.18122e-47	Up
TCN1	2.83137	1.94051e-27	1.89365e-26	Up
PGLYRP1	2.86313	2.89252e-42	1.00965e-40	Up
CA4	2.9195	8.74757e-47	4.79819e-45	Up
ANKRD22	2.9384	2.569e-39	6.67873e-38	Up
LTF	2.97063	1.38514e-22	9.8841e-22	Up
BCL2A1	2.99706	3.985e-53	5.23451e-51	Up
VNN1	3.00847	4.7125e-53	6.10973e-51	Up
ZDHHC19	3.01714	7.2191e-27	6.79194e-26	Up
BMX	3.07755	1.65104e-49	1.39681e-47	Up
IL1R2	3.16784	6.49126e-55	1.13688e-52	Up
RGL4	3.18404	4.1944e-47	2.36569e-45	Up
GADD45A	3.50609	8.82308e-68	9.78676e-65	Up
ANXA3	3.58049	3.5605e-73	8.88611e-70	Up
OLFM4	3.7837	4.15818e-21	2.69029e-20	Up
LCN2	3.98357	8.27535e-31	1.05643e-29	Up
RETN	4.21643	3.63486e-42	1.2556e-40	Up
CLEC4D	4.22379	1.30006e-64	9.27037e-62	Up
GPR84	4.29899	4.15655e-44	1.71466e-42	Up
MMP8	4.4756	8.14337e-27	7.64053e-26	Up
HP	4.81305	3.93826e-54	6.04857e-52	Up
ARG1	4.91525	9.95279e-80	9.93587e-76	Up
CD177	5.54047	9.06948e-58	2.26351e-55	Up
FC, fold change.
